# Supplementary material for: Long-term Effects of Perceived Stress, Anxiety, and Anger on Hospitalizations or Death and Health Status in Heart Failure Patients
Source: bioRxiv or medRxiv preprint supplement (doi:10.1101/2021.09.14.21263592), 2021-09-17
Supplement: Supplementary file [file media-2.pdf]

ONLINE SUPPLEMENT II: eTable3, eTable 4, and eTable 5

eTable 3. Associations between Perceived Stress Score (PSS) and Hospitalizations: B (SE) and OR (CI) from Generalized Marginal Models.

| Covariates                                   | Exposure <sup>a</sup>      | <u>CHF</u><br><u>Hosp.</u> |           | <u>Cardiac</u><br><u>Hosp.</u> |                  | <u>All Cause</u><br><u>Hosp.</u> |                  | <u>All Cause Hosp.</u><br><u>or Death</u> |                  |
|----------------------------------------------|----------------------------|----------------------------|-----------|--------------------------------|------------------|----------------------------------|------------------|-------------------------------------------|------------------|
|                                              |                            | B                          | OR/       | B                              | OR/              | B                                | OR/              | B                                         | OR/              |
|                                              |                            | (SE)                       | CI        | (SE)                           | CI               | (SE)                             | CI               | (SE)                                      | CI               |
| Unadjusted                                   | Mean PSS <sup>c</sup>      | 0.04                       | 1.05      | <b>0.05*</b>                   | <b>1.05</b>      | <b>0.06**</b>                    | <b>1.06</b>      | <b>0.07**</b>                             | <b>1.07</b>      |
|                                              |                            | (0.03)                     | 0.99-1.10 | <b>(0.02)</b>                  | <b>1.01-1.10</b> | <b>(0.02)</b>                    | <b>1.02-1.11</b> | <b>(0.02)</b>                             | <b>1.03-1.11</b> |
| Cov. Adjusted <sup>d</sup>                   | Mean PSS                   | 0.04                       | 1.04      | <b>0.04*</b>                   | <b>1.05</b>      | <b>0.06**</b>                    | <b>1.06</b>      | <b>0.07*</b>                              | <b>1.07</b>      |
|                                              |                            | (0.03)                     | 0.99-1.10 | <b>(0.02)</b>                  | <b>1.00-1.09</b> | <b>(0.02)</b>                    | <b>1.02-1.11</b> | <b>(0.02)</b>                             | <b>1.03-1.11</b> |
| Adjust. for Other Psych Scales <sup>e</sup>  | Mean PSS                   | 0.03                       | 1.03      | 0.01                           | 1.01             | 0.01                             | 1.02             | 0.01                                      | 1.01             |
|                                              |                            | (0.04)                     | 0.94-1.12 | (0.04)                         | 0.94-1.09        | (0.03)                           | 0.95-1.09        | (0.04)                                    | .94-1.09         |
| Unadjusted                                   | Deviation PSS <sup>c</sup> | 0.01                       | 1.01      | 0.02                           | 1.03             | <b>0.03*</b>                     | <b>1.03</b>      | <b>0.03*</b>                              | <b>1.03</b>      |
|                                              |                            | (0.02)                     | 0.98-1.04 | (0.02)                         | 0.99-1.06        | <b>(0.01)</b>                    | <b>1.00-1.06</b> | <b>(0.01)</b>                             | <b>1.00-1.06</b> |
| Cov. Adjusted <sup>d</sup>                   | Deviation PSS              | 0.01                       | 1.01      | 0.03                           | 1.03             | <b>0.03*</b>                     | <b>1.03</b>      | <b>0.03*</b>                              | <b>1.03</b>      |
|                                              |                            | (0.02)                     | 0.97-1.04 | (0.02)                         | 0.99-1.06        | <b>(0.01)</b>                    | <b>1.00-1.06</b> | <b>(0.01)</b>                             | <b>1.00-1.06</b> |
| Adjust. for Other Psych. Scales <sup>e</sup> | Deviation PSS              | 0.00                       | 1.00      | 0.02                           | 1.02             | <b>0.03*</b>                     | <b>1.03</b>      | 0.03                                      | 1.03             |
|                                              |                            | (0.02)                     | 0.96-1.05 | (0.02)                         | 0.97-1.07        | <b>(0.02)</b>                    | <b>1.00-1.07</b> | (0.02)                                    | 0.94-1.06        |

*Note.* PSS = Perceived Stress Scale score, HF Hosp. = heart failure-related hospitalizations, Cardiac Hosp. = cardiac-related hospitalizations, All-Cause Hosp. = hospitalizations due to any cause, All Cause Hosp. or Death = all cause hospitalization or death; Cov. Adjusted = analyses adjusted for medical covariates, Adjusted for Other Psych. Scales = analyses adjusted for medical covariates as well as Recent Anger, and STAI-State Anxiety.

<sup>b</sup>Outcomes are hospitalizations in the time prior to the next 6-month follow-up (baseline, 3-month, 9-month, 15-month, 21-month, 27 month, 33-month, and 39-month follow-ups) (see text for details). B (SE) values are parameter estimates from generalized estimating equations models.

<sup>a</sup>Exposure refers to the Mean PSS score and Deviation PSS score for their respective analyses.

<sup>c</sup>Mean PSS scores and Deviation PSS scores are entered concurrently. All models include time as a within-subject variable.

<sup>d</sup>Adjusted analyses include the following covariates: ejection fraction, NYHA class, hypertensive status, presence of type I or type II diabetes, implantable defibrillator status, age, gender, income, and race (parameter estimates for time or covariates not shown).

<sup>e</sup>Analyses including above covariates and STAI-State Anxiety and Recent Anger.

\* $p < 0.05$ , \*\*  $p < 0.01$ , \*\*\*  $p < 0.001$ . These results are also bolded.

eTable 4. Associations between Anxiety (STAI) Score and Outcomes Variables: Parameter estimates B (SE) and OR (CI) from generalized marginal models.

| Covariates                                   | Exposure <sup>a</sup>       | <u>CHF Hosp.</u> |             | <u>Cardiac Hosp.</u> |             | <u>All Cause Hosp.</u> |             | <u>All Cause Hosp. or Death</u> |             |
|----------------------------------------------|-----------------------------|------------------|-------------|----------------------|-------------|------------------------|-------------|---------------------------------|-------------|
|                                              |                             | B                | OR/         | B                    | OR/         | B                      | OR/         | B                               | OR/         |
|                                              |                             | (SE)             | CI          | (SE)                 | CI          | (SE)                   | CI          | (SE)                            | CI          |
| Unadjusted                                   | Mean STAI <sup>c</sup>      | <b>0.05*</b>     | <b>1.05</b> | <b>0.04**</b>        | <b>1.05</b> | <b>0.06***</b>         | <b>1.06</b> | <b>0.06***</b>                  | <b>1.07</b> |
|                                              |                             | (0.02)           | 1.01-1.09   | (0.02)               | 1.01-1.08   | (0.02)                 | 1.03-1.09   | (0.02)                          | 1.03-1.10   |
| Cov. Adjusted <sup>d</sup>                   | Mean STAI                   | <b>0.05*</b>     | <b>1.05</b> | <b>0.05**</b>        | <b>1.05</b> | <b>0.06***</b>         | <b>1.06</b> | <b>0.07***</b>                  | <b>1.07</b> |
|                                              |                             | (0.02)           | 1.01-1.10   | (0.02)               | 1.02-1.09   | (0.02)                 | 1.03-1.10   | (0.02)                          | 1.04-1.10   |
| Adjust. for Other Psych Scales <sup>e</sup>  | Mean STAI                   | <b>0.06*</b>     | <b>1.07</b> | 0.06                 | 1.06        | <b>0.06*</b>           | <b>1.07</b> | <b>0.07*</b>                    | <b>1.07</b> |
|                                              |                             | (0.03)           | 1.00-1.14   | (0.03)               | 1.00-1.12   | (0.03)                 | 1.01-1.12   | (0.03)                          | 1.02-1.13   |
| Unadjusted                                   | Deviation STAI <sup>c</sup> | 0.00             | 1.00        | 0.01                 | 1.01        | 0.01                   | 1.01        | 0.01                            | 1.01        |
|                                              |                             | (0.01)           | 0.97-1.02   | (0.01)               | 0.99-1.04   | (0.01)                 | 0.99-1.04   | (0.01)                          | .99-1.03    |
| Cov. Adjusted <sup>d</sup>                   | Deviation STAI              | 0.00             | 1.00        | 0.01                 | 1.01        | 0.01                   | 1.01        | 0.01                            | 1.01        |
|                                              |                             | (0.01)           | 0.97-1.03   | (0.01)               | 0.99-1.04   | (0.01)                 | 0.99-1.03   | (0.01)                          | .98-1.03    |
| Adjust. for Other Psych. Scales <sup>e</sup> | Deviation STAI              | -0.01            | 0.99        | 0.00                 | 1.00        | 0.00                   | 1.00        | 0.00                            | 1.00        |
|                                              |                             | (0.02)           | 0.96-1.05   | (0.01)               | 0.97-1.04   | (0.01)                 | 0.98-1.03   | (0.01)                          | .98-1.03    |

*Note.* STAI = State Trait Anxiety Inventory-State Anxiety score, HF Hosp. = heart failure-related hospitalizations, Cardiac Hosp. = cardiac-related hospitalizations, All-Cause Hosp. = hospitalizations due to any cause, All Cause Hosp. or Death = all cause hospitalization or death;

Cov. Adjusted = analyses adjusted for medical covariates. Adjusted for Other Psych. Scales=analyses adjusted for medical covariates, as well as PSS, and Recent Anger.

<sup>a</sup>Exposure refers to the Mean STAI score and Deviation STAI score for their respective analyses. (See text for details).

<sup>b</sup>Outcomes are hospitalizations occurring after each assessment (baseline, 3-month, 9-month, 15-month, 21-month, 27-month, 33-month, and 39-month follow-ups). B (SE) are parameter estimates from generalized estimating equations models.

<sup>c</sup>Mean STAI scores and Deviation STAI scores are entered concurrently (see text). All models include time as a within-subject variable.

<sup>d</sup>Adjusted analyses for hospitalizations include the following covariates: ejection fraction, NYHA class, hypertensive status, presence of type I or type II diabetes, implantable defibrillator status, age, gender, income, and race (parameter estimates for time or covariates not shown).

<sup>e</sup>Analyses including above covariates and PSS, and Recent Anger.

\* $p < 0.05$ , \*\*  $p < 0.01$ , \*\*\*  $p < 0.001$ . These results are also bolded

eTable 5. Associations between Anger Score and Outcomes Variables: Parameter estimates B (SE) and OR (CI) from generalized marginal models

| Covariates                                   | Exposure <sup>a</sup>        | <u>CHF Hosp.</u> |                  | <u>Cardiac Hosp.</u> |           | <u>All Cause Hosp.</u> |           | <u>All Cause Hosp. or Death</u> |          |
|----------------------------------------------|------------------------------|------------------|------------------|----------------------|-----------|------------------------|-----------|---------------------------------|----------|
|                                              |                              | B                | OR/              | B                    | OR/       | B                      | OR/       | B                               | OR/      |
|                                              |                              | (SE)             | CI               | (SE)                 | CI        | (SE)                   | CI        | (SE)                            | CI       |
| Unadjusted                                   | Mean Anger <sup>c</sup>      | -0.02            | 0.98             | 0.01                 | 1.01      | 0.02                   | 1.02      | 0.02                            | 1.02     |
|                                              |                              | (0.03)           | 0.93-1.03        | (0.02)               | 0.97-1.04 | (0.02)                 | 0.98-1.05 | (0.02)                          | .99-1.05 |
| Cov. Adjusted <sup>d</sup>                   | Mean Anger                   | -0.02            | 0.98             | 0.00                 | 1.00      | 0.02                   | 1.02      | 0.02                            | 1.02     |
|                                              |                              | (0.03)           | 0.92-1.04        | (0.02)               | 0.97-1.04 | (0.02)                 | 0.98-1.05 | (0.02)                          | .99-1.06 |
| Adjust. for Other Psych Scales <sup>e</sup>  | Mean Anger                   | <b>-0.06*</b>    | <b>0.94</b>      | -0.03                | 0.97      | -0.02                  | 0.98      | -0.02                           | 0.98     |
|                                              |                              | <b>(0.03)</b>    | <b>0.89-0.99</b> | (0.02)               | 0.93-1.01 | (0.02)                 | 0.94-1.02 | (0.02)                          | .94-1.03 |
| Unadjusted                                   | Deviation Anger <sup>c</sup> | 0.02             | 1.02             | 0.02                 | 1.02      | 0.00                   | 1.00      | 0.00                            | 1.00     |
|                                              |                              | (0.01)           | 1.00-1.05        | (0.01)               | 0.99-1.04 | (0.01)                 | 0.98-1.02 | (0.01)                          | .98-1.03 |
| Cov. Adjusted <sup>d</sup>                   | Deviation Anger              | 0.02             | 1.02             | 0.02                 | 1.02      | 0.00                   | 1.00      | 0.01                            | 1.01     |
|                                              |                              | (0.01)           | 1.00-1.05        | (0.01)               | 1.00-1.04 | (0.01)                 | 0.98-1.02 | (0.01)                          | .98-1.03 |
| Adjust. for Other Psych. Scales <sup>e</sup> | Deviation Anger              | 0.03             | 1.03             | 0.01                 | 1.01      | -0.01                  | 0.99      | 0.00                            | 1.00     |
|                                              |                              | (0.01)           | 1.00-1.06        | (0.01)               | 0.98-1.04 | (0.01)                 | 0.97-1.01 | (0.01)                          | .98-1.02 |

*Note.* Anger= Recent Anger score, HF Hosp. = heart failure-related hospitalizations, Cardiac Hosp. = cardiac-related hospitalizations, All-Cause Hosp. = hospitalizations due to any cause, All Cause Hosp. or Death = all cause hospitalization or death; Cov. Adjusted = analyses adjusted for covariates, Adjusted for Other Psych. Scales = analyses adjusted for medical covariates as well as for PSS and STAI State Anxiety.

<sup>a</sup>Exposure refers to the Mean Anger and Deviation Anger score for their respective analyses. (See text for details).

<sup>b</sup>Outcomes are hospitalizations occurring after each assessment (baseline, 3-month, 9-month, 15-month, 21-month, 27-month, 33-month, and 39-month follow-ups. B (SE) values are parameter estimates from generalized estimating equation models.

<sup>c</sup>Mean Anger scores and Deviation Anger scores are entered concurrently (see text). All models include time as a within-subject variable.

<sup>d</sup>Adjusted analyses for hospitalizations include the following covariates: ejection fraction, NYHA class, hypertensive status, presence of type I or type II diabetes, implantable defibrillator status, age, gender, income, and race (parameter estimates for time or covariates not shown).

<sup>e</sup>Analyses including above covariates, PSS, and STAI-State Anxiety.

\* $p < 0.05$ , \*\*  $p < 0.01$ , \*\*\*  $p < 0.001$ . These results are also bolded.
